# Supplementary material
Source: PubMed Central journal article supplement (PMC9556536)
Supplement: 41598_2022_21587_MOESM1_ESM.pdf [file 41598_2022_21587_MOESM1_ESM.pdf]

# Sex difference in innate inflammatory response and macrophage polarization in *Streptococcus agalactiae*-induced pneumonia and potential role of microRNA-223-3p

Maud Deny<sup>1</sup>, Luis Alexis Arroba Nuñez<sup>1</sup>, Marta Romano<sup>2</sup>, Olivier Denis<sup>2</sup>, Georges Casimir<sup>1</sup> and Mustapha Chamekh<sup>1\*</sup>

<sup>1</sup> Inflammation Unit, Laboratory of Pediatric Research, Faculty of medicine, Free university of Brussels (Université libre de Bruxelles)

<sup>2</sup> Immune Response Service, Sciensano, Brussels, Belgium.

\* Corresponding author: [mchamekh@ulb.ac.be](mailto:mchamekh@ulb.ac.be)

## Supplementary data

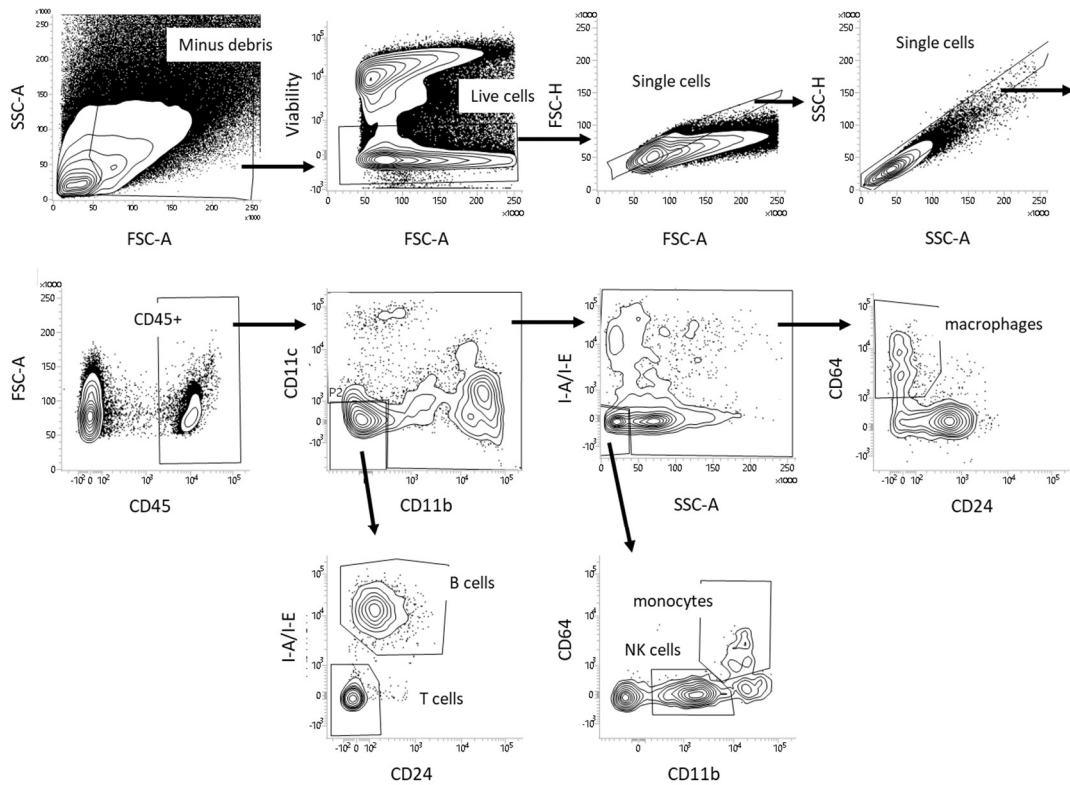

**Figure S1.** Gating strategy followed in flow cytometry analysis of monocytes, macrophages, B cells, T cells and NK cells in the lungs of naive and GBS-infected mice.

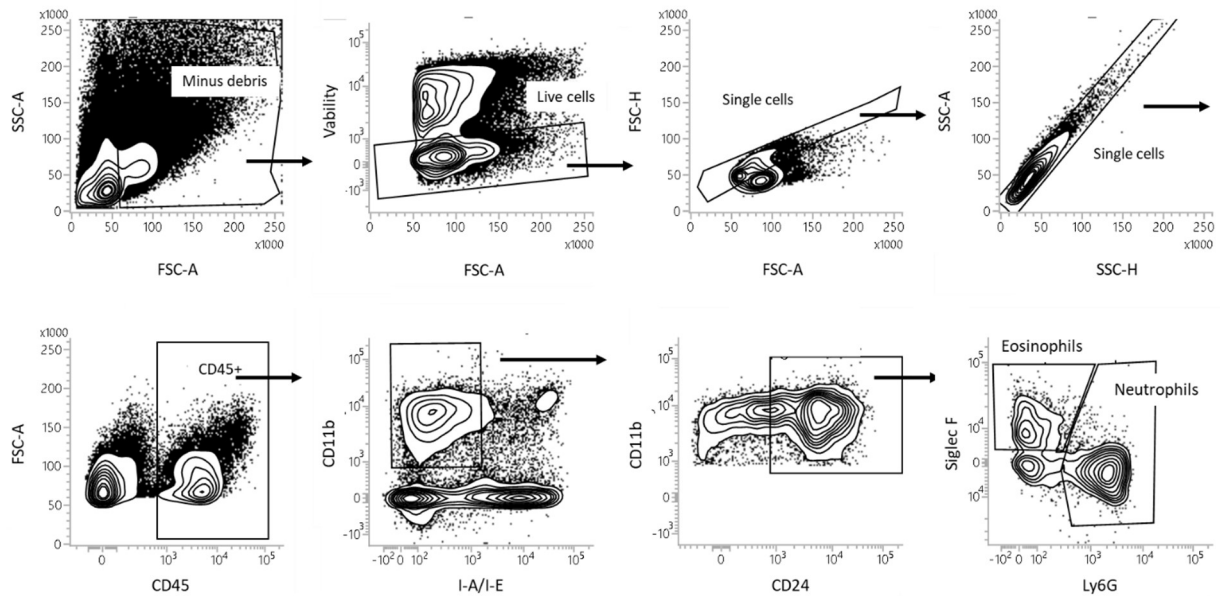

**Figure S2.** Gating strategy followed in flow cytometry analysis of neutrophils and eosinophils in the lungs of naive and GBS-infected mice.

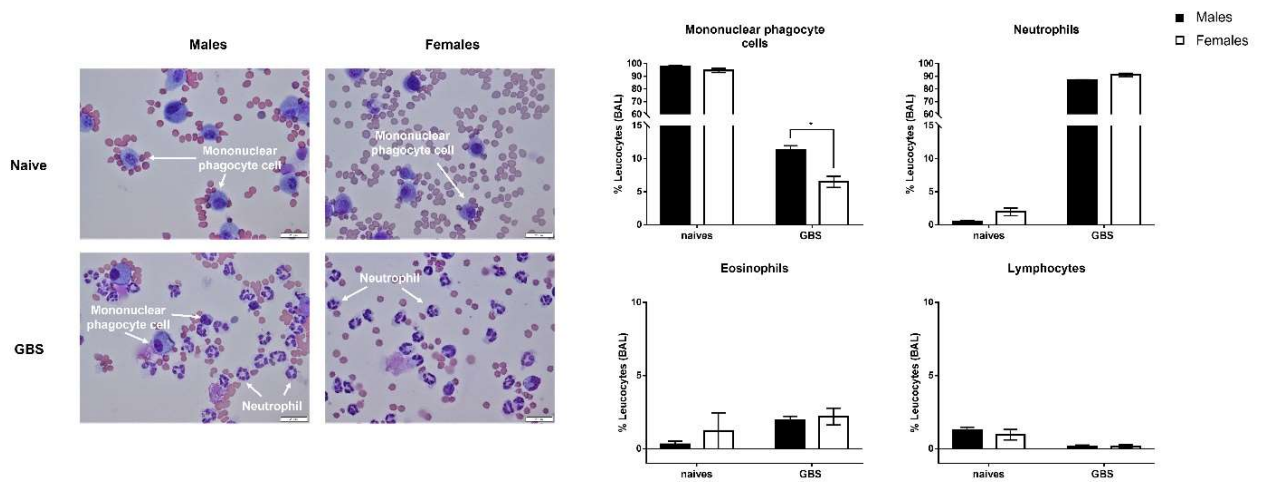

**Figure S3.** Sex difference in leukocyte cells in bronchoalveolar lavage (BAL) in naive and GBS-infected mice. C57BL/6 male (black) and female (white) mice were infected intranasally with  $\pm 10^8$  CFUs of GBS. Age-matched naive male and female mice were used as controls (n=5 for each group). 24h pi, BALs were performed, and the recovered cells were fixed and stained with Diff-Quik staining kit. A minimum of 600 cells were counted by microscopy. Data are means  $\pm$  SD. \*p<0.05 (Mann-Whitney U test).

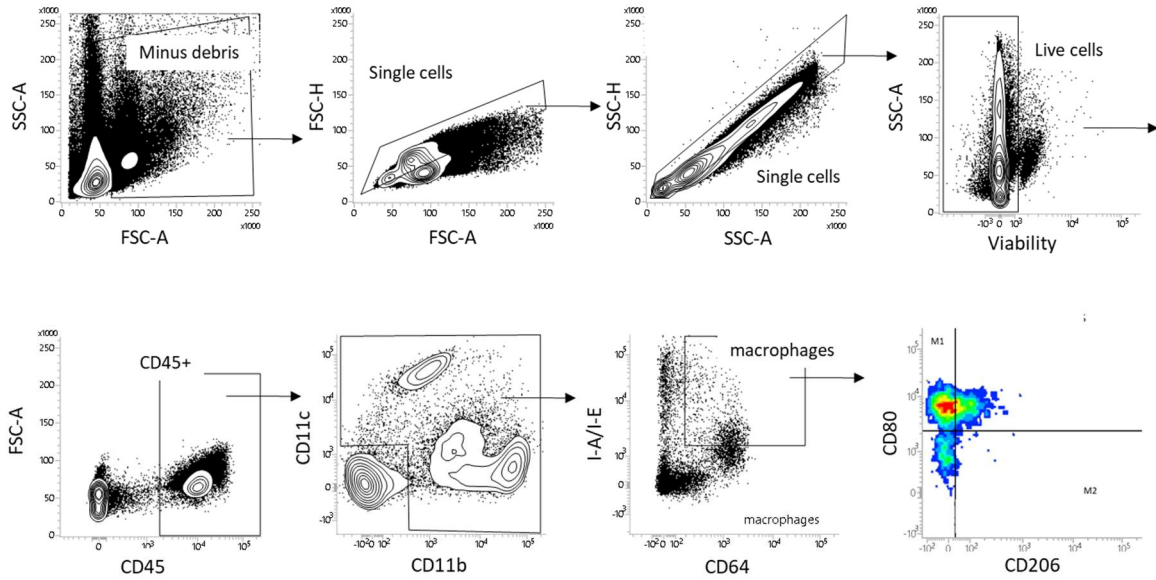

**Figure S4.** Gating strategy followed in flow cytometry analysis of CD80+CD206- macrophages (M1) and CD80-CD206+ macrophages (M2) in the lungs of naive and GBS-infected mice.

| CFUs count before frozen at -80°C with 50% glycerol |                        |                                      | CFUs count after thawing and resuspension with sterile PBS at the desired concentration (1*10 <sup>9</sup> /mL). |                        |                           |
|-----------------------------------------------------|------------------------|--------------------------------------|------------------------------------------------------------------------------------------------------------------|------------------------|---------------------------|
|                                                     |                        |                                      | <b>Test 1</b>                                                                                                    |                        |                           |
| <u>Dilution factors</u>                             | <u>Mean CFUs count</u> | <u>number of GBS in 1 stock tube</u> | <u>Dilution factors</u>                                                                                          | <u>Mean CFUs count</u> | <u>number of GBS/mL</u>   |
| 6*10 <sup>6</sup>                                   | 145                    | 8.17*10 <sup>8</sup>                 | 4*10 <sup>6</sup>                                                                                                | 235                    | 9.4*10 <sup>8</sup>       |
| 1*10 <sup>7</sup>                                   | 52                     | 5.2*10 <sup>8</sup>                  | 4*10 <sup>7</sup>                                                                                                | 24                     | 9.6*10 <sup>8</sup>       |
| mean                                                |                        | <b>6.95*10<sup>8</sup></b>           | mean                                                                                                             |                        | <b>9.5*10<sup>8</sup></b> |
|                                                     |                        |                                      | <b>Test 2</b>                                                                                                    |                        |                           |
| <u>Dilution factors</u>                             | <u>Mean CFUs count</u> | <u>number of GBS/mL</u>              |                                                                                                                  |                        |                           |
| 2*10 <sup>7</sup>                                   | 75                     | 1.5*10 <sup>9</sup>                  |                                                                                                                  |                        |                           |
| 2*10 <sup>8</sup>                                   | 8                      | 1.6*10 <sup>9</sup>                  |                                                                                                                  |                        |                           |
| mean                                                |                        | <b>1.55*10<sup>9</sup></b>           |                                                                                                                  |                        |                           |

**Table S1.** Representative data of CFUs (colony forming units) enumeration on Todd Hewitt Agar (THA) media plates with 15mg/mL nalidixic acid, after freezing and thawing and resuspension to the desired concentration.
